# Supplementary material for: Human GBP1 Differentially Targets Salmonella and Toxoplasma to License Recognition of Microbial Ligands and Caspase-Mediated Death
Source: PubMed Central journal article supplement — Cell Rep. 2020 Aug 11;32(6):108008. doi: 10.1016/j.celrep.2020.108008 (PMC7435695; doi:10.1016/j.celrep.2020.108008), 2020-08-11
Supplement: mmc1.pdf [file mmc1.pdf]

Cell Reports, Volume 32

## Supplemental Information

### **Human GBP1 Differentially Targets *Salmonella* and *Toxoplasma* to License Recognition of Microbial Ligands and Caspase-Mediated Death**

**Daniel Fisch, Barbara Clough, Marie-Charlotte Domart, Vesela Encheva, Hironori Bando, Ambrosius P. Snijders, Lucy M. Collinson, Masahiro Yamamoto, Avinash R. Shenoy, and Eva-Maria Frickel**

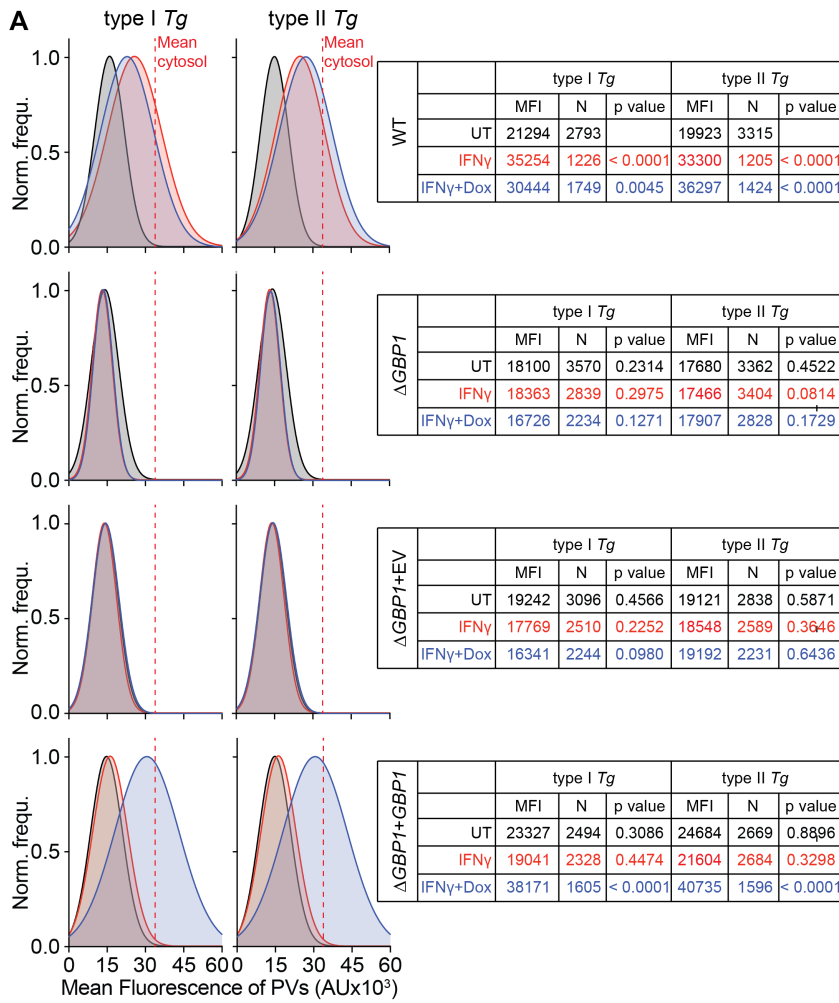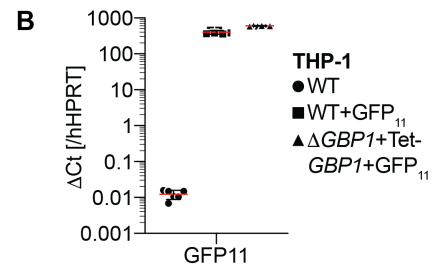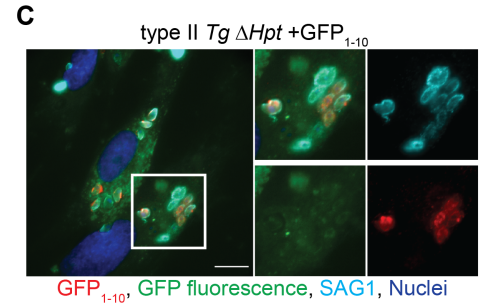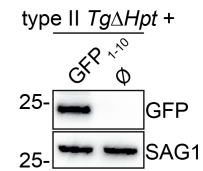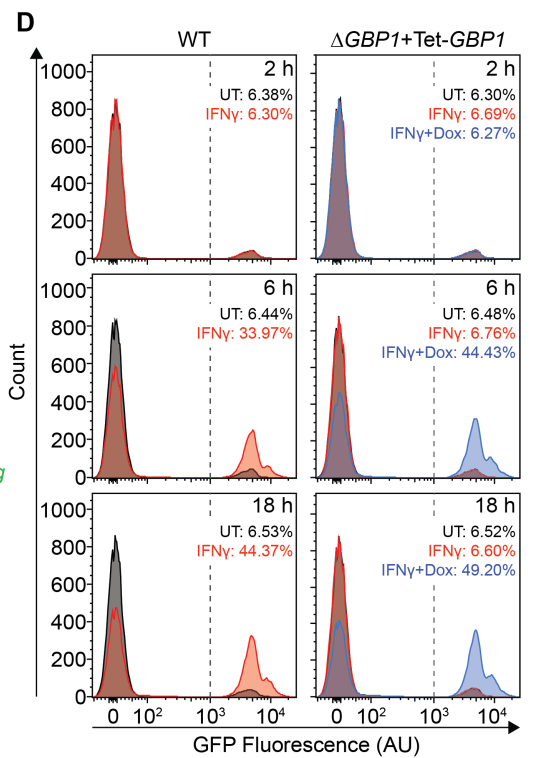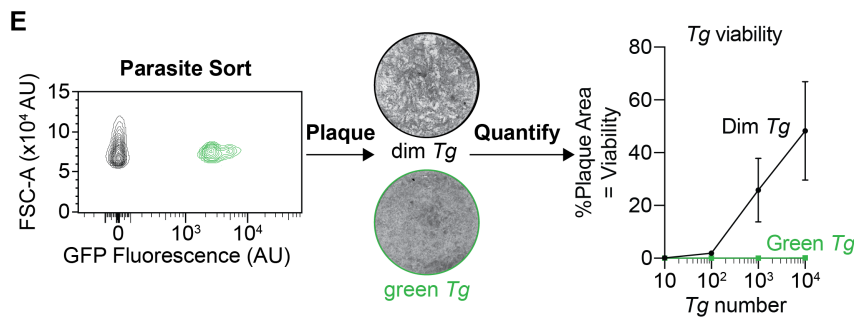

**Figure S1: Novel dye influx assay and split-GFP system allows quantitation of GBP1 contribution to *Toxoplasma* vacuole and parasite disruption (Related to Figure 1).**

**(A)** Representative normalized frequency plots (Norm. frequ.) and data tables of fluorescence intensities of vacuoles in type I or type II *Tg*-infected THP-1 WT, THP-1  $\Delta$ GBP1, THP-1  $\Delta$ GBP1+Tet-empty vector (EV) or THP-1  $\Delta$ GBP1+Tet-GBP1 cells treated with IFN $\gamma$ , Doxycycline (Dox) or left untreated and stained with CellMask. Mean fluorescence signal of the cytosol indicated by dashed red line and mean fluorescence intensity of the vacuoles (MFI) shown in table. N = number of vacuoles.

**(B)** RT-qPCR to confirm expression of GFP<sub>11</sub> fragment in the cytosol of THP-1 WT and THP-1  $\Delta$ GBP1+Tet-GBP1 cells transduced with GFP<sub>11</sub>-Lentiviral particles.

**(C)** Representative immunofluorescence images (top) and immunoblot (bottom) from type II *Tg*  $\Delta$ Hpt+GFP<sub>1-10</sub> or type II *Tg*  $\Delta$ Hpt to confirm expression of the GFP fragment and absence of GFP fluorescence. Red: anti-GFP for GFP<sub>1-10</sub>; Green: GFP fluorescence; White: *Tg* surface antigen 1 (SAG1); Blue: Nuclei. Scale bar 20  $\mu$ m.

**(D)** Representative flow cytometry analysis of proportion of GFP-fluorescing and thus disrupted parasites harvested from untreated (UT) or IFN $\gamma$ -primed THP-1 WT+GFP<sub>11</sub> or from untreated, IFN $\gamma$ -only or IFN $\gamma$ - and Doxycycline (Dox)-treated THP-1  $\Delta$ GBP1+Tet-GBP1+GFP<sub>11</sub> cells at 2, 6 or 18 hours post infection. Proportion of fluorescing parasites above the threshold of 10<sup>3</sup> AU indicated in the figure.

**(E)** Viability determination of Pru  $\Delta$ Hpt+GFP<sub>1-10</sub> parasites harvested from IFN $\gamma$ -primed THP-1 WT+GFP<sub>11</sub> cells at 18 hours p.i, sorted based on their fluorescence (left), plaqued onto HFF cells (middle) and quantification of plaque area depending on number of parasites used for plaque formation (right).

**Data information:** Graphs show mean  $\pm$  SEM in **(B)** from n = 6 and in **(E)** from n = 3 independent experiments. Graphs in **(A)** representative of n = 3 independent experiments. *P* values in **(A)** from nested one-way ANOVA comparing means of n = 3 independent experiments from indicated condition to untreated WT cells.

THP-1 WT +IFN $\gamma$

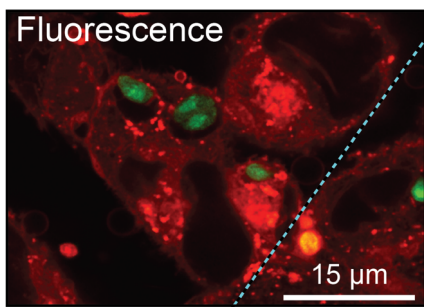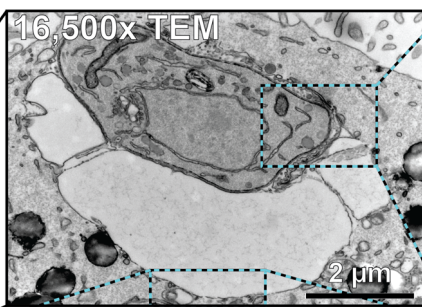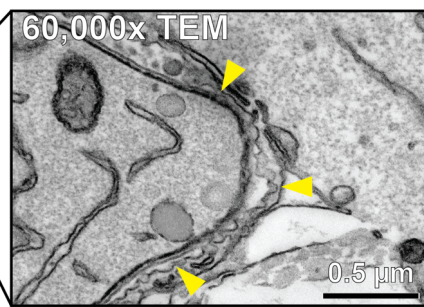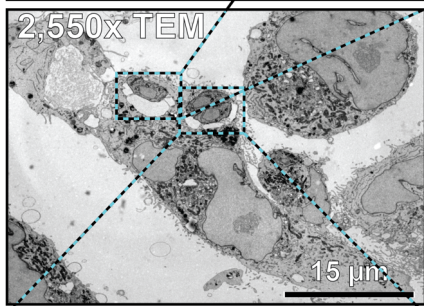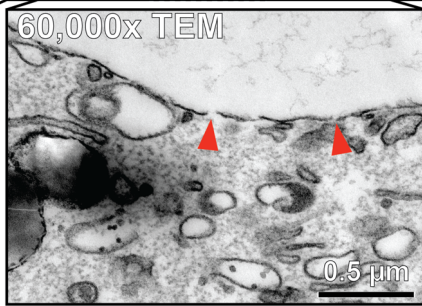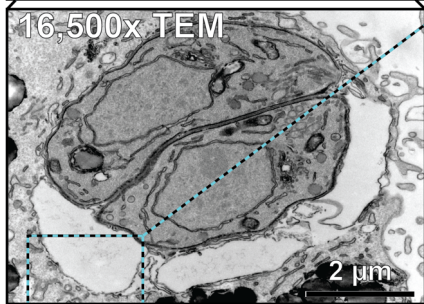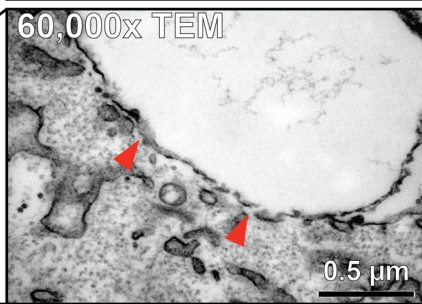

THP-1  $\Delta$ GBP1 +IFN $\gamma$

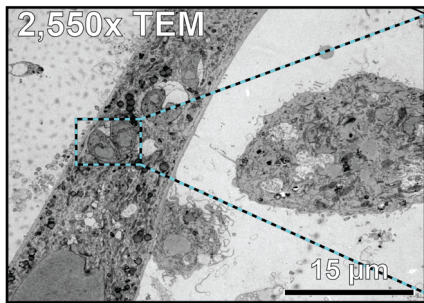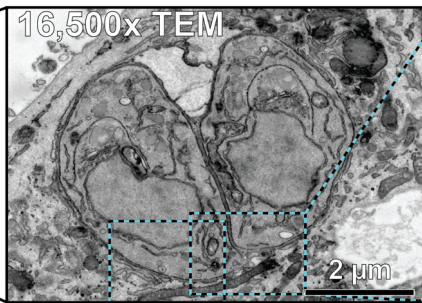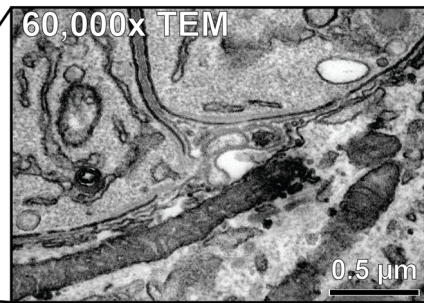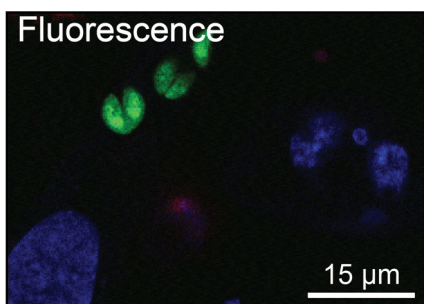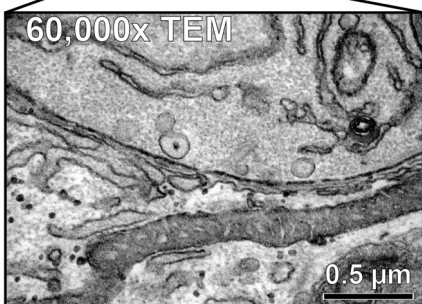

**Figure S2: Correlative light and electron microscopy reveals ultrastructural defects of GBP1-targeted *Toxoplasma* vacuole membranes (Related to Figure 1).**

Representative images of correlative light and electron microscopy of THP-1 WT or  $\Delta GBP1$  cells (flooded with CellMask for fluorescence imaging), pre-treated with IFN $\gamma$  to induce GBP1 expression and infected with type I (RH) *Tg* for 6 hours. Parasites indicated boxes are shown at higher magnifications as indicated (TEM, transmission electron microscopy). Yellow arrowheads mark areas of vacuole membrane ruffling and red arrowheads mark areas of vacuole membrane disruption. Red: CellMask; Green: *Tg*; Blue: Nuclei. Scale bars as indicated.

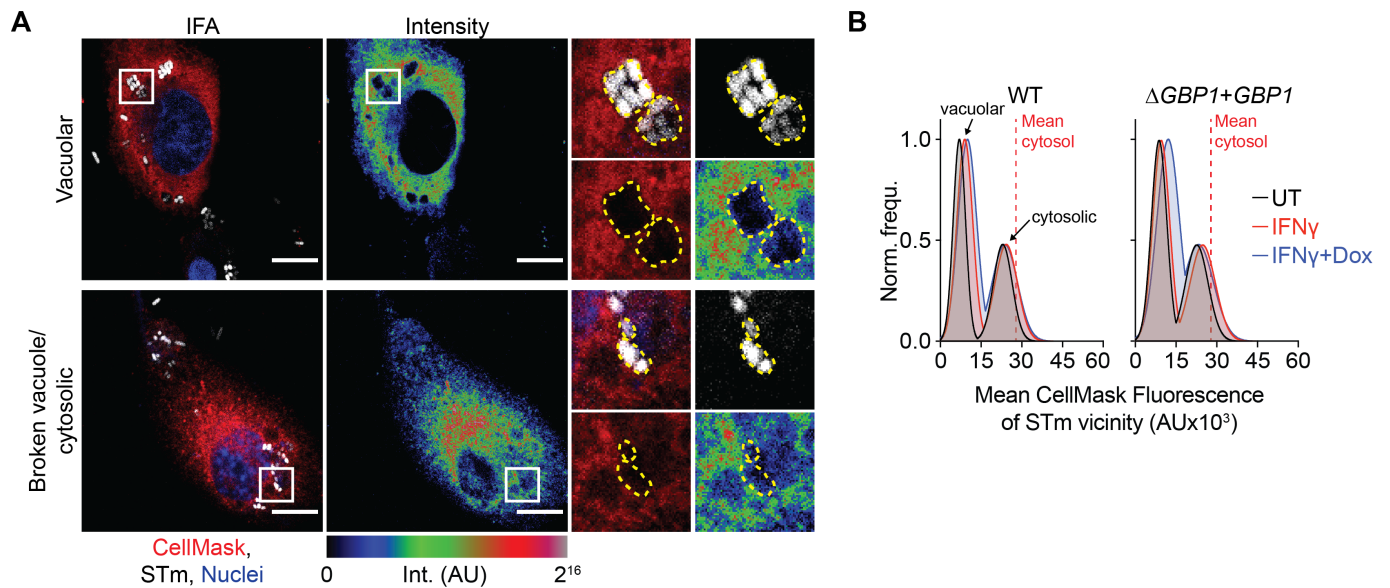

**Figure S3: CellMask dye influx assay for measuring *Salmonella* vacuole escape (Related to Figure 2).**

**(A)** Representative immunofluorescence images and fluorescence intensity map of intact *Salmonella* Typhimurium (STm)-containing vacuoles (SCVs) or broken SCV/STm in the cytosol of IFN $\gamma$ -primed and CellMask-flooded THP-1 WT macrophages at 4 hours p.i. Area of interest for fluorescence intensity measurement as automatically determined by HRMAN indicated by the yellow, dashed line. Red: CellMask; Grey: STm; Blue: Nuclei. Scale bars 10  $\mu$ m.

**(B)** Representative normalized frequency plots (Norm. frequ.) of fluorescence intensities of vicinity of STm in infected THP-1 WT or THP-1  $\Delta GBP1+Tet-GBP1$  cells treated with IFN $\gamma$ , Doxycycline (Dox) or left untreated and stained with CellMask. Mean fluorescence signal of the cytosol indicated by dashed red line.

**Data information:** Graphs in **(B)** representative of  $n = 2$  independent experiments.

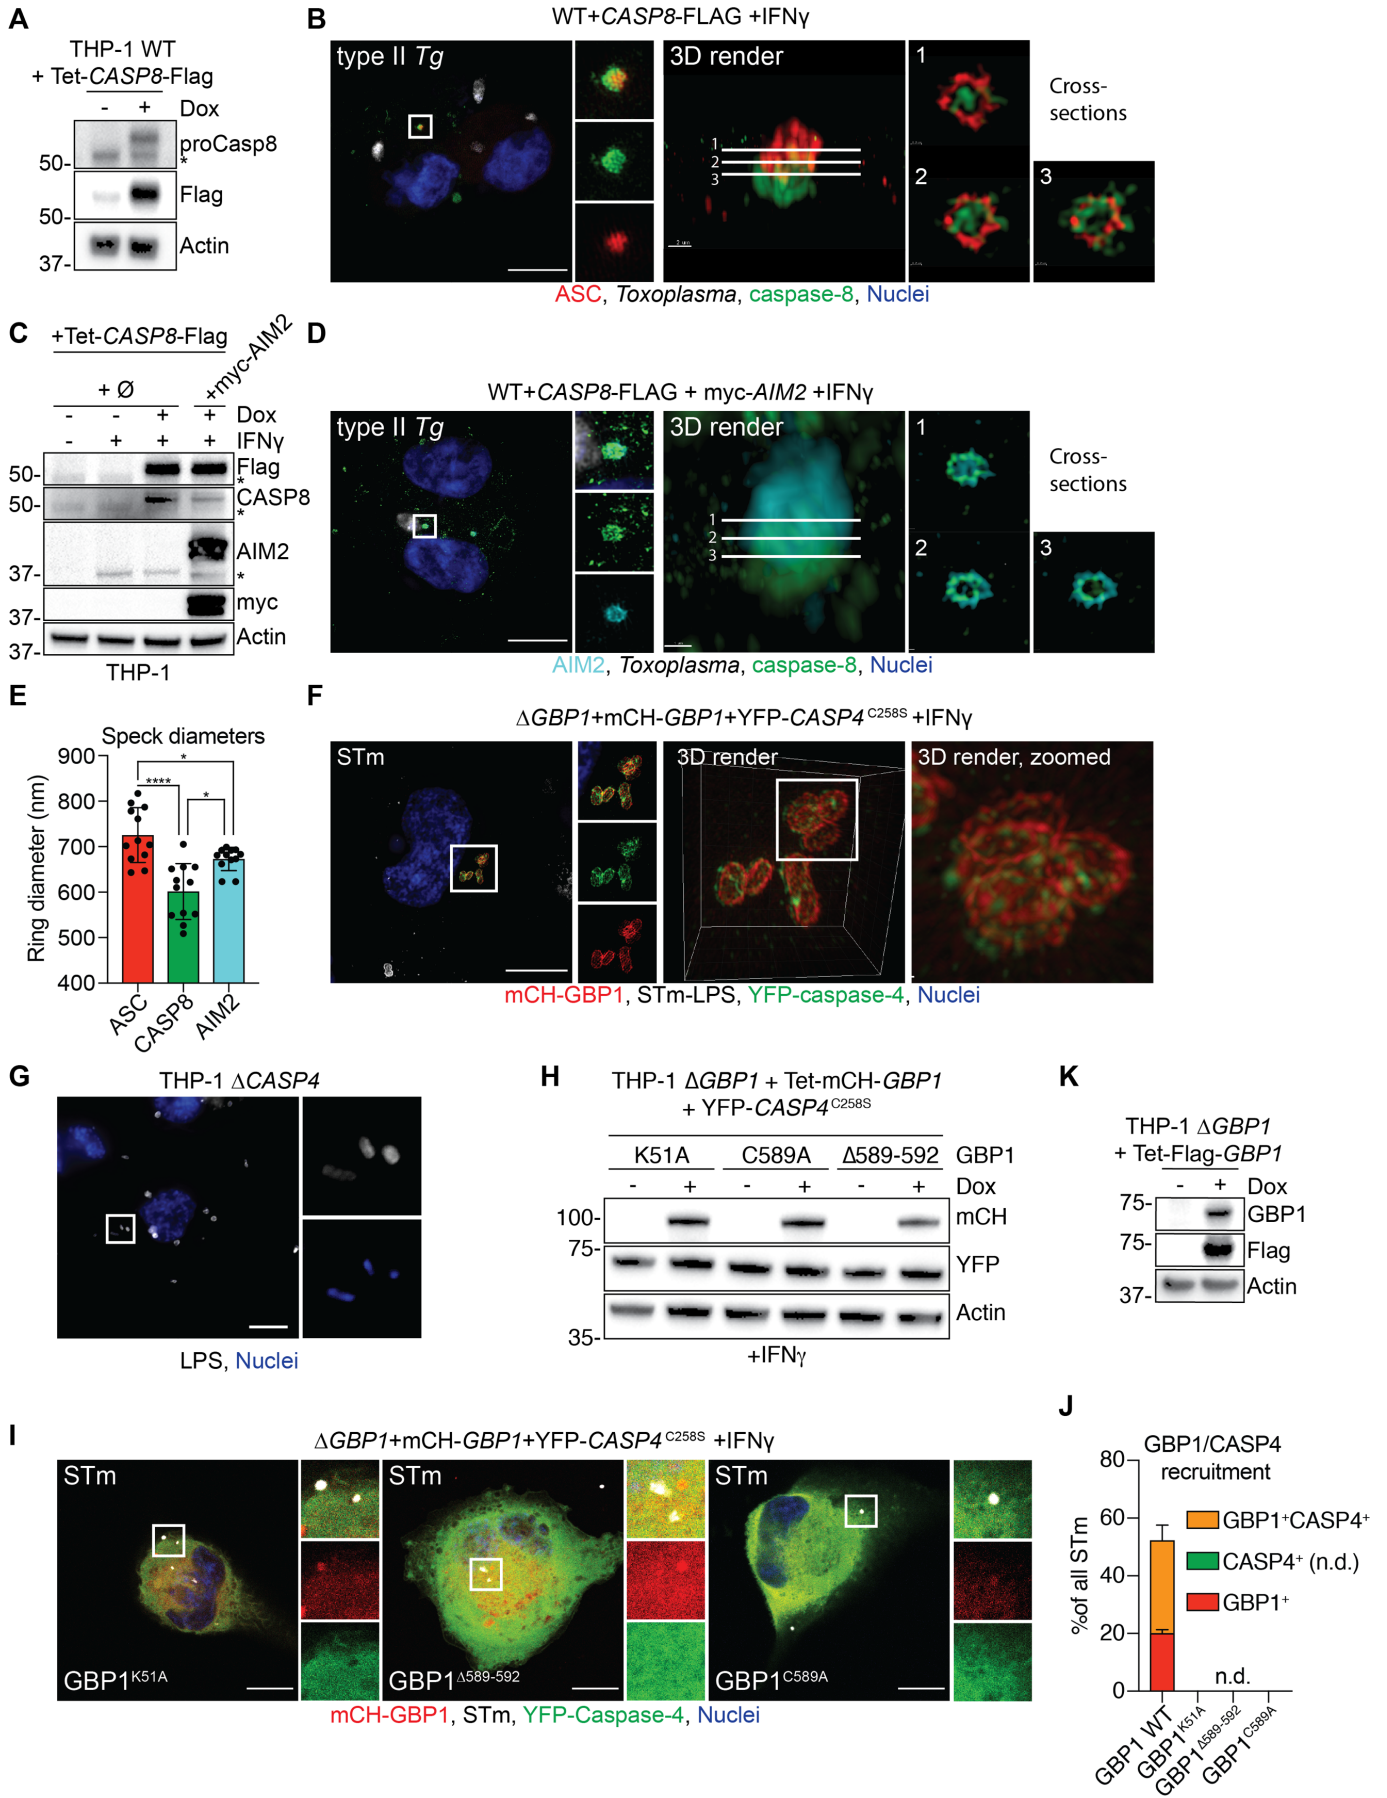

**Figure S4: SIM of caspase activation platforms, molecular determinants of GBP1 and caspase-4 recruitment to cytosolic *Salmonella* and cell line verification immunoblots (Related to Figure 3).**

**(A)** Representative immunoblots for proCaspase-8, Flag and  $\beta$ -actin from THP-1 +Tet-CASP8-Flag cells showing Doxycycline (Dox)-inducible caspase-8-Flag expression. Cells were treated with Dox as indicated or left untreated. \* endogenous caspase-8.

**(B)** Left: Representative structured illumination immunofluorescence microscopy images from THP-1 WT+Tet-CASP8-Flag cells treated with IFN $\gamma$  and Dox to induce caspase-8 expression and infected with type II *Toxoplasma gondii* (*Tg*) for 4 hours. Right: 3D reconstruction and slices through the ASC-caspase-8 speck. Red: ASC; Grey: *Tg*; Green: caspase-8; Blue: Nuclei. Scale bar 10  $\mu$ m.

**(C)** Representative immunoblots for Flag, caspase-8 (CASP8), AIM2, myc and  $\beta$ -actin from THP-1 WT, THP-1 +Tet-CASP8-Flag and THP-1 +Tet-CASP8-Flag+myc-AIM2 cells showing Dox-inducible caspase-8-Flag expression and constitutive expression of myc-AIM2. Cells were treated with IFN $\gamma$ , Dox or left untreated as indicated. \* endogenous proteins.

**(D)** Left: Representative structured illumination immunofluorescence microscopy images from THP-1+Tet-CASP8-Flag+myc-AIM2 cells treated with IFN $\gamma$  and Dox and infected with type II *Tg* for 4 hours. Right: 3D reconstruction and slices through the AIM2-caspase-8 speck. Cyan: AIM2; Grey: *Tg*; Green: caspase-8; Blue: Nuclei. Scale bar 10  $\mu$ m.

**(E)** Ring diameters of the indicated proteins within an inflammasome speck of cells shown in **(B)** and **(D)**.

**(F)** Left: Representative structured illumination immunofluorescence microscopy images from THP-1  $\Delta$ GBP1+Tet-mCH-GBP1+YFP-CASP4<sup>C258S</sup> cell treated with IFN $\gamma$  and Dox and infected with *Salmonella* Typhimurium (STm) SL1344 (MOI = 30) for 2 hours. Right: 3D reconstruction of the GBP1-caspase-4 signaling platform on the cytosolic STm. Red: mCH-GBP1; Grey: STm-LPS; Green: YFP-caspase-4; Blue: Nuclei. Scale bar 10  $\mu$ m.

**(G)** Representative immunofluorescence image of THP-1  $\Delta$ CASP4 cells infected with STm SL1344 (MOI = 30) for 1 hour and stained with monoclonal anti-*Salmonella*-LPS antibody. Grey: STm-LPS; Blue: Nuclei. Scale bar: 5  $\mu$ m.

**(H)** Representative immunoblots for mCherry, YFP and  $\beta$ -actin from THP-1  $\Delta$ GBP1+Tet-mCH-GBP1 cells expressing the indicated mutant of GBP1 and also stably expressing YFP-CASP4<sup>C258S</sup>. Cells were primed with IFN $\gamma$  and treated with Doxycycline (Dox) as indicated.

**(I)** Representative immunofluorescence images and **(J)** quantification of GBP1 and caspase-4 recruitment to STm in IFN $\gamma$ -primed and Dox-treated THP-1  $\Delta$ GBP1+Tet-mCH-GBP1+YFP-CASP4<sup>C258S</sup> cells infected with STm SL1344 (MOI = 30) for 2 hours. Cells expressed the indicated mutants of GBP1. Red: mCH-GBP1; Grey: STm; Green: YFP-caspase-4; Blue: Nuclei. Scale bar 10  $\mu$ m; n.d. not detected.

**(K)** Representative immunoblots for GBP1, Flag and  $\beta$ -actin from THP-1  $\Delta$ GBP1+Tet-Flag-GBP1 cells showing Dox-inducible Flag-GBP1 expression. Cells were treated with Doxycycline (Dox) as indicated or left untreated.

**Data information:** Graph in **(E)** shows quantification from n = 12 inflammasome specks and mean  $\pm$  SEM. Graph in **(J)** shows mean  $\pm$  SEM of n = 3 independent experiments. \*  $P \leq 0.05$ ; \*\*\*\*  $P \leq 0.0001$  for indicated comparisons in **(E)** from one-way ANOVA following adjustment for multiple comparisons.



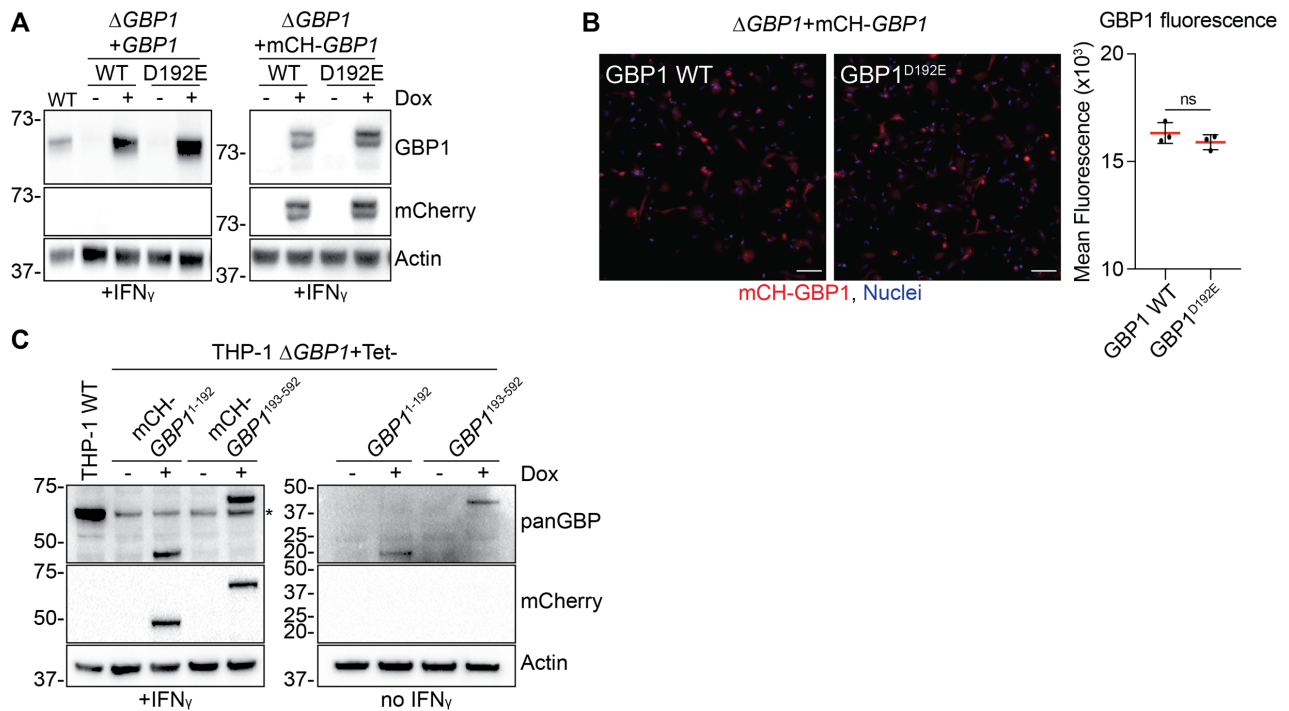

**Figure S5: Verification and quality control of GBP1<sup>D192E</sup> mutant and fragment cell lines (Related to Figure 4 and 5).**

**(A)** Representative immunoblots of GBP1, mCherry (mCH) and  $\beta$ -actin from IFN<sub>γ</sub>-primed THP-1  $\Delta$ GBP1+Tet-GBP1 or GBP1<sup>D192E</sup> with and without mCH-tag for Doxycycline (Dox)-inducible expression. Cells were treated with Dox as indicated.

**(B)** Representative images and quantification of mean fluorescence per cell from 100 fields of view from THP-1  $\Delta$ GBP1+Tet-mCH-GBP1 or +Tet-mCH-GBP1<sup>D192E</sup> cells treated with IFN<sub>γ</sub> and Dox to induce mCH-GBP1 expression. Red: mCH-GBP1; Blue: Nuclei. Scale bars 100  $\mu$ m.

**(C)** Immunoblot for human GBPs (panGBP), mCherry and Actin to confirm Dox-inducible expression of GBP1 fragments 1-192 or 193-592 with and without mCherry-tag in THP-1  $\Delta$ GBP1+Tet cells. \* Marks endogenous, other GBP family members detected by the panGBP antibody in IFN<sub>γ</sub>-treated cells.

**Data information:** Graph in **(B)** shows mean  $\pm$  SEM from n = 3 independent experiments. P values in **(B)** from t-test. ns, not significant.

### Table S1: Oligonucleotide primer.

Overview of oligonucleotide primers used in this study for molecular cloning of new plasmids and RT-qPCR. (Related to STAR methods section)

| Cloning primer        |                                                                        |                                                                                           |
|-----------------------|------------------------------------------------------------------------|-------------------------------------------------------------------------------------------|
| Name                  | Sequence 5'-3'                                                         | Purpose                                                                                   |
| pTet_CASP8-fwd        | TGCGGCCGCACCATGGGCGGTAGCGGTGTAC                                        | Amplify <i>CASP8</i> ORF for cloning into pTet backbone                                   |
| Flag_CASP8-rev        | GTGGTCCTTATAGTCATCAGAAGGGAAGACAAGTTTTTTCTTAGTGTGAAAG                   |                                                                                           |
| Casp-8_Flag-fwd       | GTCTTCCCTTCTGATGACTATAAGGACCACGACGG                                    | Amplify Flag-tag for cloning into pTet backbone with <i>CASP8</i> ORF                     |
| pTet-Flag-rev         | GATCGATCAGGGATCCTACTTATCGTCATCGTCTTTGTAATCAATATC                       |                                                                                           |
| Flag_GBP1-fwd         | GATATTGATTACAAAGACGATGACGATAAGATGGCATCAGAGATCCACATGACAGG               | Amplify <i>GBP1</i> ORF for cloning into pTet backbone                                    |
| pTet_GBP1-rev         | CTAGCGAATTCGGCCGATCGATCAGGGATCTTAGCTTATGGTACATGCCTTTCGTCGTC            |                                                                                           |
| pTet_Flag-fwd         | AATTAGCGCTACCGGTGCGGCCGCCACCATGGACTATAAGGACCACGACGGAG                  | Amplify Flag-tag for cloning into pTet backbone with <i>GBP1</i> ORF                      |
| GBP1_Flag-rev         | TGGGCTGTCATGTTGGATCTCTGATGCCATCTTATCGTCATCGTCTTTGTAATCAATATCATGATCCTTG |                                                                                           |
| GBP1-D192E-fwd        | CCCTGGACTTGAAGCAGAGGGACAACCCC                                          | Mutate <i>GBP1</i> ORF                                                                    |
| GBP1-D192E-rev        | GGGACCTGAACCTTCGTCCTCCCTGTTGGGG                                        |                                                                                           |
| pLEX-AIM2-fwd         | CTCGAGCTCAAGCTTGCACCATGGAACAGAACTCATCTCTGAAGAGGATCTG                   | Amplify myc-AIM2 ORF for cloning into pLEX backbone                                       |
| pLEX-AIM2-rev         | CCGCTTTACTTGTACCCTAGAAATAGGGCCCTCTAGATGCATGCCTC                        |                                                                                           |
| pLenti-repair-1-fwd   | CGGGAGTATCCG                                                           | Repair digested lentiCRISPR-V2                                                            |
| pLenti-repair-1-rev   | AATTCGGATATCCCGGTAC                                                    |                                                                                           |
| pLenti-repair-2-fwd   | CTAGACTCGAGGATCG                                                       | Repair digested lentiCRISPR-V2 and add multiple cloning site                              |
| pLenti-repair-2-rev   | GATCCGATCCTCGAGT                                                       |                                                                                           |
| GFP11-PCR-fwd         | AACACAGGACCGGTTGCCACCATGCGCGATCACATGGTCCCTGCT                          | Amplify GFP11 ORF for cloning into pLenti-P2A-Puro backbone                               |
| GFP11-PCR-rev         | TTGTTGCGCCGGATCCCTTGTACAGCTCGTCCATGCCG                                 |                                                                                           |
| pGRA-GFP1-10-fwd      | ATCAAGCAAGATGCAAAATGTTCCGCCGTAACATTTGTTGCTGG                           | Amplify GFP1-10 ORF for cloning into pGRA-HA-HPT backbone                                 |
| pGRA-GFP1-10-rev      | TTCGTCGTAGTCTTATTATTTTTTCATTTGGATCTTTGCTCAGGACTGTTTGT                  |                                                                                           |
| pTet-GBP1_1-192-fwd   | AATTAGCGCTACCGGTGCGGCCGCCACCATGGCATCAGAGATCCACATGACAGG                 | Amplify <i>GBP1</i> fragment 1-192 for cloning into pLenti-Tet                            |
| pTet-GBP1_1-192-rev   | CTAGCGAATTCGGCCGATCGATCAGGGATCTTAATCTGCTTCCAAGTCCAGGGAGAAAT            |                                                                                           |
| pTet-GBP1_193-593-fwd | AATTAGCGCTACCGGTGCGGCCGCCACCATGGGACAACCCCTCACACCAGATG                  | Amplify <i>GBP1</i> fragment 193-592 for cloning into pLenti-Tet                          |
| pTet-GBP1_193-593-rev | CTAGCGAATTCGGCCGATCGATCAGGGATCTTAGCTTATGGTACATGCCTTTCGTCGTC            |                                                                                           |
| pTet-mCH-fwd          | AATTAGCGCTACCGGTGCGGCCGCCACCATGGTGAAGCAAGGGCGAGG                       | Amplify mCherry for cloning into pLenti-Tet and tagging of the two <i>GBP1</i> fragments  |
| GBP1_1-192-mCH-rev    | TGGGCTGTCATGTTGGATCTCTGATGCCATCTTGTACAGCTCGTCCATGCC                    |                                                                                           |
| GBP1_193-593-mCH-rev  | TGTGAGGGTTGTCCCATCTTGTACAGCTCGTCCATGCC                                 | Amplify <i>GBP1</i> fragment 1-192 for cloning into pLenti-Tet and tagging with mCherry   |
| mCH-GBP1_1-192-fwd    | TCCACCGCCGGCATGGACGAGCTGTACAAGATGGCATCAGAGATCCACATGACAGG               |                                                                                           |
| pTet-GBP1_1-192-rev   | CTAGCGAATTCGGCCGATCGATCAGGGATCTTAATCTGCTTCCAAGTCCAGGGAGAAAT            | Amplify <i>GBP1</i> fragment 193-592 for cloning into pLenti-Tet and tagging with mCherry |
| mCH-GBP1_193-593-fwd  | TCCACCGCCGGCATGGACGAGCTGTACAAGATGGGACAACCCCTCACACCAGATG                |                                                                                           |
| pTet-GBP1_193-593-rev | CTAGCGAATTCGGCCGATCGATCAGGGATCTTAGCTTATGGTACATGCCTTTCGTCGTC            |                                                                                           |
| qPCR primer           |                                                                        |                                                                                           |
| Name                  | Sequence 5'-3'                                                         | Purpose                                                                                   |
| GFP11-fwd             | AATCCTGGACCGACCGAGTA                                                   | qPCR for GFP11                                                                            |
| GFP11-rev             | GAGTTCTTGACAGCTCGGTGA                                                  |                                                                                           |
| HPRT-fwd              | ACCAGTCAACAGGGGACATAA                                                  | qPCR for HPRT                                                                             |
| HPRT-rev              | CTTCGTGGGTCTTTTCACC                                                    |                                                                                           |

## Table S2. Electron Microscopy sample preparation protocol.

Full BioWave program details for preparation of samples for electron microscopy.  
(Related to STAR methods section)

| Description                 | Step# | Time (min) | Time (sec) | Power (Watts) | SteadyTemp temperature (°C) | Vacuum cycle vent time (sec) | Vacuum cycle vacuum time (sec) | Vacuum set point (inch Hg) | User Prompt (1 = YES, 0 = NO) | Vacuum OFF (1 = no vacuum, 0 = vacuum) | Vacuum cycle (1 = ON, 0 = OFF) | Vacuum ON (1 = vacuum, 0 = no vacuum) |
|-----------------------------|-------|------------|------------|---------------|-----------------------------|------------------------------|--------------------------------|----------------------------|-------------------------------|----------------------------------------|--------------------------------|---------------------------------------|
| BENCH STEP Rinse in 0.1M PB | 1     | 0          | 0          | 0             | 21                          | 0                            | 0                              | 0                          | 1                             | 1                                      | 0                              | 0                                     |
| BENCH STEP Rinse in 0.1M PB | 2     | 0          | 0          | 0             | 21                          | 0                            | 0                              | 0                          | 1                             | 1                                      | 0                              | 0                                     |
| Rinse in 0.1M PB            | 3     | 0          | 40         | 250           | 21                          | 0                            | 0                              | 0                          | 1                             | 1                                      | 0                              | 0                                     |
| Rinse in 0.1M PB            | 4     | 0          | 40         | 250           | 21                          | 0                            | 0                              | 0                          | 1                             | 1                                      | 0                              | 0                                     |
| Osmium ON                   | 5     | 2          | 0          | 100           | 21                          | 0                            | 0                              | 20                         | 1                             | 0                                      | 0                              | 1                                     |
| Osmium OFF                  | 6     | 2          | 0          | 0             | 21                          | 0                            | 0                              | 20                         | 0                             | 0                                      | 0                              | 1                                     |
| Osmium ON                   | 7     | 2          | 0          | 100           | 21                          | 0                            | 0                              | 20                         | 0                             | 0                                      | 0                              | 1                                     |
| Osmium OFF                  | 8     | 2          | 0          | 0             | 21                          | 0                            | 0                              | 20                         | 0                             | 0                                      | 0                              | 1                                     |
| Osmium ON                   | 9     | 2          | 0          | 100           | 21                          | 0                            | 0                              | 20                         | 0                             | 0                                      | 0                              | 1                                     |
| Osmium OFF                  | 10    | 2          | 0          | 0             | 21                          | 0                            | 0                              | 20                         | 0                             | 0                                      | 0                              | 1                                     |
| Osmium ON                   | 11    | 2          | 0          | 100           | 21                          | 0                            | 0                              | 20                         | 0                             | 0                                      | 0                              | 1                                     |
| BENCH STEP Rinse in water   | 12    | 0          | 0          | 0             | 21                          | 0                            | 0                              | 0                          | 1                             | 1                                      | 0                              | 0                                     |
| BENCH STEP Rinse in water   | 13    | 0          | 0          | 0             | 21                          | 0                            | 0                              | 0                          | 1                             | 1                                      | 0                              | 0                                     |
| Rinse in water              | 14    | 0          | 40         | 250           | 21                          | 0                            | 0                              | 0                          | 1                             | 1                                      | 0                              | 0                                     |
| Rinse in water              | 15    | 0          | 40         | 250           | 21                          | 0                            | 0                              | 0                          | 1                             | 1                                      | 0                              | 0                                     |
| Thiocarbohydrazide ON       | 16    | 2          | 0          | 100           | 40                          | 0                            | 0                              | 20                         | 1                             | 0                                      | 0                              | 1                                     |
| Thiocarbohydrazide OFF      | 17    | 2          | 0          | 0             | 40                          | 0                            | 0                              | 20                         | 0                             | 0                                      | 0                              | 1                                     |
| Thiocarbohydrazide ON       | 18    | 2          | 0          | 100           | 40                          | 0                            | 0                              | 20                         | 0                             | 0                                      | 0                              | 1                                     |
| Thiocarbohydrazide OFF      | 19    | 2          | 0          | 0             | 40                          | 0                            | 0                              | 20                         | 0                             | 0                                      | 0                              | 1                                     |
| Thiocarbohydrazide ON       | 20    | 2          | 0          | 100           | 40                          | 0                            | 0                              | 20                         | 0                             | 0                                      | 0                              | 1                                     |
| Thiocarbohydrazide OFF      | 21    | 2          | 0          | 0             | 40                          | 0                            | 0                              | 20                         | 0                             | 0                                      | 0                              | 1                                     |
| Thiocarbohydrazide ON       | 22    | 2          | 0          | 100           | 40                          | 0                            | 0                              | 20                         | 0                             | 0                                      | 0                              | 1                                     |
| BENCH STEP Rinse in water   | 23    | 0          | 0          | 0             | 21                          | 0                            | 0                              | 0                          | 1                             | 1                                      | 0                              | 0                                     |
| BENCH STEP Rinse in water   | 24    | 0          | 0          | 0             | 21                          | 0                            | 0                              | 0                          | 1                             | 1                                      | 0                              | 0                                     |
| Rinse in water              | 25    | 0          | 40         | 250           | 21                          | 0                            | 0                              | 0                          | 1                             | 1                                      | 0                              | 0                                     |
| Rinse in water              | 26    | 0          | 40         | 250           | 21                          | 0                            | 0                              | 0                          | 1                             | 1                                      | 0                              | 0                                     |
| Osmium ON                   | 27    | 2          | 0          | 100           | 21                          | 0                            | 0                              | 20                         | 1                             | 0                                      | 0                              | 1                                     |
| Osmium OFF                  | 28    | 2          | 0          | 0             | 21                          | 0                            | 0                              | 20                         | 0                             | 0                                      | 0                              | 1                                     |
| Osmium ON                   | 29    | 2          | 0          | 100           | 21                          | 0                            | 0                              | 20                         | 0                             | 0                                      | 0                              | 1                                     |
| Osmium OFF                  | 30    | 2          | 0          | 0             | 21                          | 0                            | 0                              | 20                         | 0                             | 0                                      | 0                              | 1                                     |
| Osmium ON                   | 31    | 2          | 0          | 100           | 21                          | 0                            | 0                              | 20                         | 0                             | 0                                      | 0                              | 1                                     |
| Osmium OFF                  | 32    | 2          | 0          | 0             | 21                          | 0                            | 0                              | 20                         | 0                             | 0                                      | 0                              | 1                                     |
| Osmium ON                   | 33    | 2          | 0          | 100           | 21                          | 0                            | 0                              | 20                         | 0                             | 0                                      | 0                              | 1                                     |
| BENCH STEP Rinse in water   | 34    | 0          | 0          | 0             | 21                          | 0                            | 0                              | 0                          | 1                             | 1                                      | 0                              | 0                                     |
| BENCH STEP Rinse in water   | 35    | 0          | 0          | 0             | 21                          | 0                            | 0                              | 0                          | 1                             | 1                                      | 0                              | 0                                     |
| Rinse in water              | 36    | 0          | 40         | 250           | 21                          | 0                            | 0                              | 0                          | 1                             | 1                                      | 0                              | 0                                     |
| Rinse in water              | 37    | 0          | 40         | 250           | 21                          | 0                            | 0                              | 0                          | 1                             | 1                                      | 0                              | 0                                     |
| Uranyl acetate ON           | 38    | 2          | 0          | 100           | 40                          | 0                            | 0                              | 20                         | 1                             | 0                                      | 0                              | 1                                     |
| Uranyl acetate OFF          | 39    | 2          | 0          | 0             | 40                          | 0                            | 0                              | 20                         | 0                             | 0                                      | 0                              | 1                                     |
| Uranyl acetate ON           | 40    | 2          | 0          | 100           | 40                          | 0                            | 0                              | 20                         | 0                             | 0                                      | 0                              | 1                                     |
| Uranyl acetate OFF          | 41    | 2          | 0          | 0             | 40                          | 0                            | 0                              | 20                         | 0                             | 0                                      | 0                              | 1                                     |
| Uranyl acetate ON           | 42    | 2          | 0          | 100           | 40                          | 0                            | 0                              | 20                         | 0                             | 0                                      | 0                              | 1                                     |
| Uranyl acetate OFF          | 43    | 2          | 0          | 0             | 40                          | 0                            | 0                              | 20                         | 0                             | 0                                      | 0                              | 1                                     |
| Uranyl acetate ON           | 44    | 2          | 0          | 100           | 40                          | 0                            | 0                              | 20                         | 0                             | 0                                      | 0                              | 1                                     |
| BENCH STEP Rinse in water   | 45    | 0          | 0          | 0             | 40                          | 0                            | 0                              | 0                          | 1                             | 1                                      | 0                              | 0                                     |
| BENCH STEP Rinse in water   | 46    | 0          | 0          | 0             | 40                          | 0                            | 0                              | 0                          | 1                             | 1                                      | 0                              | 0                                     |
| Rinse in water              | 47    | 0          | 45         | 250           | 40                          | 0                            | 0                              | 0                          | 1                             | 1                                      | 0                              | 0                                     |
| Rinse in water              | 48    | 0          | 45         | 250           | 40                          | 0                            | 0                              | 0                          | 1                             | 1                                      | 0                              | 0                                     |
| Lead aspartate ON           | 49    | 2          | 0          | 100           | 50                          | 0                            | 0                              | 20                         | 1                             | 0                                      | 0                              | 1                                     |
| Lead aspartate OFF          | 50    | 2          | 0          | 0             | 50                          | 0                            | 0                              | 20                         | 0                             | 0                                      | 0                              | 1                                     |
| Lead aspartate ON           | 51    | 2          | 0          | 100           | 50                          | 0                            | 0                              | 20                         | 0                             | 0                                      | 0                              | 1                                     |
| Lead aspartate OFF          | 52    | 2          | 0          | 0             | 50                          | 0                            | 0                              | 20                         | 0                             | 0                                      | 0                              | 1                                     |
| Lead aspartate ON           | 53    | 2          | 0          | 100           | 50                          | 0                            | 0                              | 20                         | 0                             | 0                                      | 0                              | 1                                     |
| Lead aspartate OFF          | 54    | 2          | 0          | 0             | 50                          | 0                            | 0                              | 20                         | 0                             | 0                                      | 0                              | 1                                     |
| Lead aspartate ON           | 55    | 2          | 0          | 100           | 50                          | 0                            | 0                              | 20                         | 0                             | 0                                      | 0                              | 1                                     |
| BENCH STEP Rinse in water   | 56    | 0          | 0          | 0             | 21                          | 0                            | 0                              | 0                          | 1                             | 1                                      | 0                              | 0                                     |
| BENCH STEP Rinse in water   | 57    | 0          | 0          | 0             | 21                          | 0                            | 0                              | 0                          | 1                             | 1                                      | 0                              | 0                                     |
| Rinse in water              | 58    | 0          | 45         | 250           | 21                          | 0                            | 0                              | 0                          | 1                             | 1                                      | 0                              | 0                                     |
| Rinse in water              | 59    | 0          | 45         | 250           | 21                          | 0                            | 0                              | 0                          | 1                             | 1                                      | 0                              | 0                                     |
| 70% Ethanol ON              | 60    | 0          | 40         | 250           | 21                          | 0                            | 0                              | 0                          | 1                             | 1                                      | 0                              | 0                                     |
| 70% Ethanol ON              | 61    | 0          | 40         | 250           | 21                          | 0                            | 0                              | 0                          | 1                             | 1                                      | 0                              | 0                                     |
| 90% Ethanol ON              | 62    | 0          | 40         | 250           | 21                          | 0                            | 0                              | 0                          | 1                             | 1                                      | 0                              | 0                                     |
| 90% Ethanol ON              | 63    | 0          | 40         | 250           | 21                          | 0                            | 0                              | 0                          | 1                             | 1                                      | 0                              | 0                                     |
| 100% Ethanol ON             | 64    | 0          | 40         | 250           | 21                          | 0                            | 0                              | 0                          | 1                             | 1                                      | 0                              | 0                                     |
| 100% Ethanol ON             | 65    | 0          | 40         | 250           | 21                          | 0                            | 0                              | 0                          | 1                             | 1                                      | 0                              | 0                                     |
| 50% Resin ON                | 66    | 3          | 0          | 250           | 21                          | 30                           | 30                             | 20                         | 1                             | 0                                      | 1                              | 0                                     |
| 100% Resin ON               | 67    | 3          | 0          | 250           | 21                          | 30                           | 30                             | 20                         | 1                             | 0                                      | 1                              | 0                                     |
| 100% Resin ON               | 68    | 3          | 0          | 250           | 21                          | 30                           | 30                             | 20                         | 1                             | 0                                      | 1                              | 0                                     |
| 100% Resin ON               | 69    | 3          | 0          | 250           | 21                          | 30                           | 30                             | 20                         | 1                             | 0                                      | 1                              | 0                                     |
| 100% Resin ON               | 70    | 3          | 0          | 250           | 21                          | 30                           | 30                             | 20                         | 1                             | 0                                      | 1                              | 0                                     |
| TURN SYSTEM OFF             | 71    | 0          | 0          | 0             | 21                          | 0                            | 0                              | 0                          | 0                             | 1                                      | 0                              | 0                                     |
